# Supplementary material
Source: publisher site journal article supplement (https://www.dovepress.com/article/437291)
Supplement: Supplementary file 1 [file get_supplementary_file.php]

# **Downregulation of ST6GAL2 correlates to liver inflammation and predicts adverse prognosis in hepatocellular carcinoma**

Ruijia Liu<sup>1,2#</sup>, Xudong Yu<sup>1#</sup>, Xu Cao<sup>1,2</sup>, Xuyun Wang<sup>3</sup>, Yijun Liang<sup>2</sup>, Wenying Qi<sup>1,2</sup>, Yong'an Ye<sup>1,2</sup>,

Xiaobin Zao<sup>1,2,4\*</sup>

1 Dongzhimen Hospital, Beijing University of Chinese Medicine, Beijing 100700, China;

2 Institute of Liver Diseases, Dongzhimen Hospital, Beijing University of Chinese Medicine, Beijing 100700, China;

3 Beijing Hospital of Traditional Chinese Medicine, Capital Medical University, Beijing, China;

4 Key Laboratory of Chinese Internal Medicine of Ministry of Education and Beijing, Dongzhimen Hospital, Beijing University of Chinese Medicine, Beijing 100700, China.

# These authors contributed equally.

## **\*Corresponding authors:**

Xiaobin Zao, MD

Assistant Researcher

Key Laboratory of Chinese Internal Medicine of Ministry of Education and Beijing, Dongzhimen Hospital, Beijing University of Chinese Medicine, 5 Haiyuncang Rd, Dongcheng District, Beijing 100700, PR China;

Tel: +86-10-8401-3194;

E-mail: A3417@bucm.edu.cn

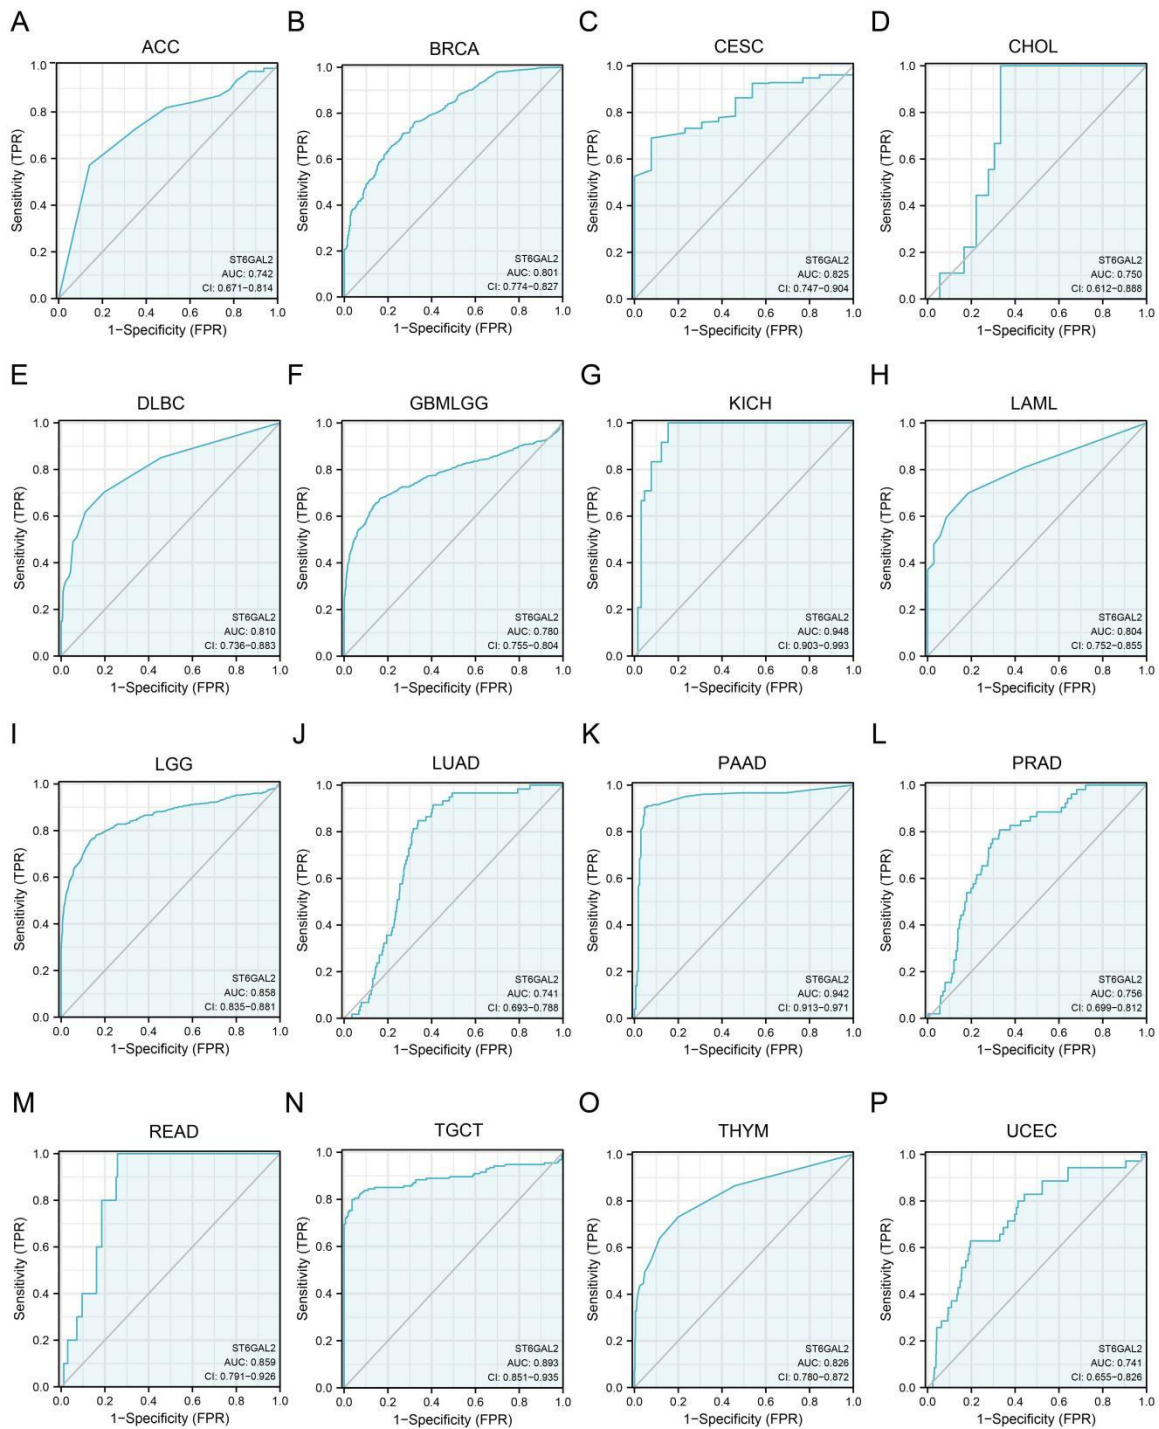

**Figure S1. (A-P)** The receiver operating characteristic curve analysis of STG6GAL2 expression in adrenocortical carcinoma (**ACC, A**), breast invasive carcinoma (**BRCA, B**), cervical squamous cell carcinoma and endocervical adenocarcinoma (**CESC, C**), cholangiocarcinoma (**CESC, D**), lymphoid neoplasm diffuse large B-cell lymphoma

(DLBC, E), lower grade glioma and glioblastoma (GBMLGG, F), kidney chromophobe (KICH, G), acute myeloid leukemia (LAML, H), lower grade glioma (LGG, I), lung adenocarcinoma (LUAD, J), pancreatic adenocarcinoma (PAAD, K), prostate adenocarcinoma (PRAD, L), rectum adenocarcinoma (READ, M), testicular germ cell tumors (TCCT, N), thymoma (THYM, O), and uterine corpus endometrial carcinoma (UCEC, P).

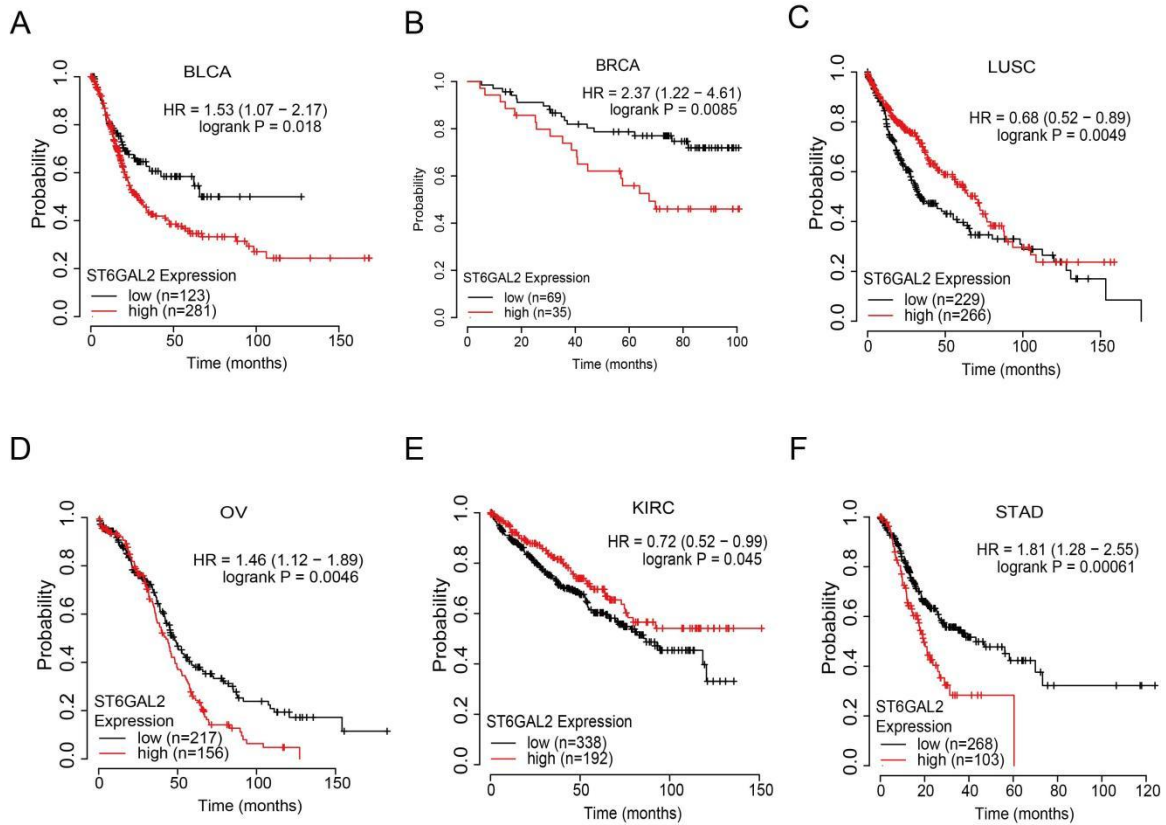

**Figure S2. (A-F)** The overall survival analysis of ST6GAL2 expression in bladder urothelial carcinoma (BLCA, A), breast invasive carcinoma (BRCA, B), lung squamous cell carcinoma (LUSC, C), ovarian serous cystadenocarcinoma (OV, D), kidney renal clear cell carcinoma (KIRC, E), and stomach adenocarcinoma (STAD, F).

A

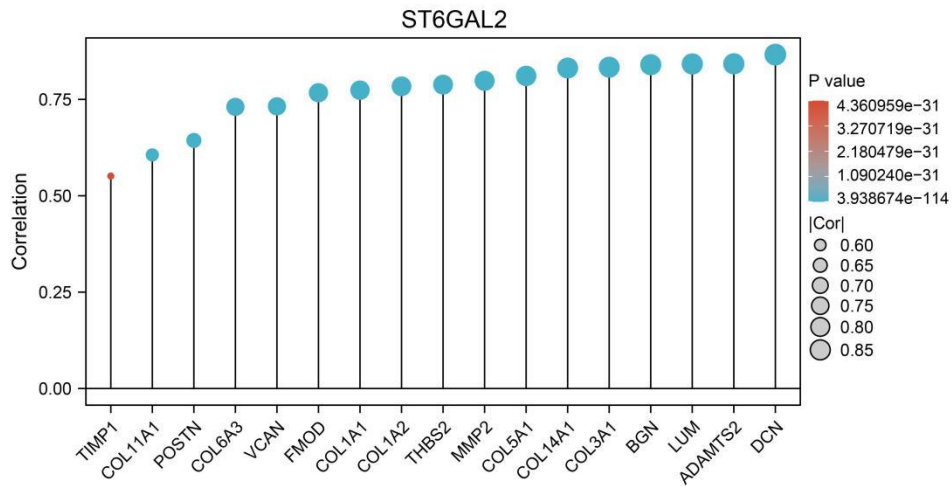

B

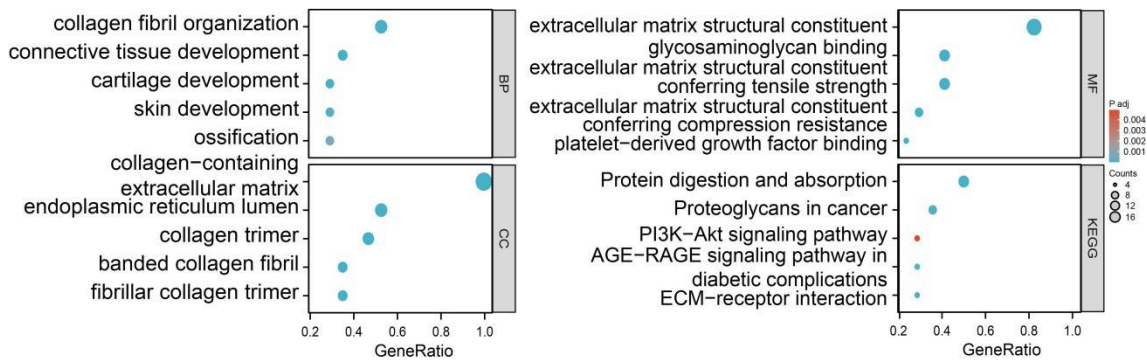

**Figure S3.** Further studies targeting hub genes. **(A)** Association between ST6GAL2 and all 17 hub genes; **(B)** The enrichment analysis results of 17 hub genes.

Table S1| Correlation analysis between ST6GAL2 and gene markers of immune cells in TIMER

| Description         | Gene markers | HCC    |        |        |        |
|---------------------|--------------|--------|--------|--------|--------|
|                     |              | None   |        | Purity |        |
|                     |              | Cor    | P      | Cor    | P      |
| B cell              | CD19         | 0.254  | ***    | 0.146  | **     |
|                     | CD79A        | 0.354  | ***    | 0.202  | ***    |
| T cell(general)     | CD3D         | 0.214  | ***    | 0.061  | 0.2582 |
|                     | CD3E         | 0.356  | ***    | 0.188  | ***    |
|                     | CD2          | 0.329  | ***    | 0.170  | **     |
| CD8+ T cell         | CD8A         | 0.313  | ***    | 0.181  | ***    |
|                     | CD8B         | 0.200  | ***    | 0.059  | 0.2779 |
| Treg                | FOXP3        | 0.223  | ***    | 0.149  | ***    |
|                     | CCR8         | 0.338  | ***    | 0.255  | ***    |
|                     | TGFB1        | 0.548  | ***    | 0.457  | ***    |
| TFH                 | CD4          | 0.388  | ***    | 0.282  | ***    |
|                     | CXCL13       | 0.132  | *      | 0.031  | 0.5722 |
|                     | MME          | -0.007 | 0.8998 | -0.009 | 0.8741 |
|                     | BCL6         | 0.020  | 0.7066 | 0.027  | 0.6148 |
| Dendritic cell      | HLA-DPB1     | 0.381  | ***    | 0.230  | ***    |
|                     | HLA-DRA      | 0.354  | ***    | 0.199  | ***    |
|                     | HLA-DPA1     | 0.370  | ***    | 0.224  | ***    |
|                     | CD1C         | 0.464  | ***    | 0.348  | ***    |
|                     | NRP1         | 0.395  | ***    | 0.368  | ***    |
|                     | ITGAX        | 0.354  | ***    | 0.211  | ***    |
|                     | CD163        | 0.306  | ***    | 0.143  | **     |
| Macrophages         | CD68         | 0.209  | ***    | 0.036  | 0.5015 |
|                     | MRC1         | 0.246  | ***    | 0.145  | **     |
|                     | MSR1         | 0.400  | ***    | 0.306  | ***    |
|                     | MARCO        | 0.351  | ***    | 0.217  | ***    |
|                     | TPSB2        | 0.335  | ***    | 0.246  | ***    |
|                     | TPSAB1       | 0.340  | ***    | 0.251  | ***    |
| Mast cells          | CPA3         | 0.386  | ***    | 0.326  | ***    |
|                     | MS4A2        | 0.364  | ***    | 0.281  | ***    |
|                     | HDC          | 0.125  | *      | 0.026  | 0.6319 |
| Neutrophils         | CEACAM8      | 0.052  | 0.3155 | 0.013  | 0.8151 |
|                     | ITGAM        | 0.333  | ***    | 0.231  | ***    |
|                     | CCR7         | 0.411  | ***    | 0.250  | ***    |
|                     | KIR2DL1      | 0.028  | 0.5940 | -0.006 | 0.9065 |
|                     | KIR2DL3      | 0.123  | *      | 0.048  | 0.3709 |
| Natural killer cell | KIR2DL4      | 0.043  | 0.4060 | -0.036 | 0.5035 |
|                     | KIR3DL1      | 0.107  | *      | 0.061  | 0.2594 |
|                     | KIR3DL2      | 0.164  | **     | 0.091  | 0.0907 |
|                     | KIR3DL3      | -0.009 | 0.8588 | -0.026 | 0.6243 |
|                     | KIR2DS4      | 0.036  | 0.4943 | 0.038  | 0.4861 |

\* $P < 0.05$ , \*\* $P < 0.01$ , \*\*\* $P < 0.001$ .

Table S2| Correlation analysis between ST6GAL2 and gene markers of different types of T cells in TIMER.

| Description            | Gene markers | HCC    |        |        |        |
|------------------------|--------------|--------|--------|--------|--------|
|                        |              | None   |        | Purity |        |
|                        |              | Cor    | P      | Cor    | P      |
| Th1                    | TBX21        | 0.224  | ***    | 0.064  | 0.2367 |
|                        | STAT4        | 0.343  | ***    | 0.272  | ***    |
|                        | STAT1        | 0.275  | ***    | 0.219  | ***    |
|                        | TNF          | 0.287  | ***    | 0.148  | **     |
|                        | IFNG         | 0.106  | **     | -0.001 | 0.9876 |
| Th1-like               | HAVCR2       | 0.371  | ***    | 0.216  | ***    |
|                        | CXCR3        | 0.288  | ***    | 0.141  | **     |
|                        | BHLHE40      | 0.304  | ***    | 0.311  | ***    |
|                        | CD4          | 0.388  | ***    | 0.282  | ***    |
| Th2                    | STAT6        | 0.223  | ***    | 0.240  | ***    |
|                        | STAT5A       | 0.295  | ***    | 0.234  | ***    |
| Resting Treg           | IL2RA        | 0.268  | ***    | 0.096  | 0.0743 |
| Effector Treg T-cell   | TNFRSF9      | 0.199  | ***    | 0.136  | *      |
|                        | CX3CR1       | 0.395  | ***    | 0.346  | ***    |
| Effector T-cell        | FGFBP2       | -0.010 | 0.8481 | -0.043 | 0.4208 |
|                        | FCGR3A       | 0.282  | ***    | 0.163  | **     |
|                        | CCR7         | 0.411  | ***    | 0.250  | ***    |
| Naïve T-cell           | SELL         | 0.331  | ***    | 0.221  | ***    |
|                        | DUSP4        | 0.473  | ***    | 0.376  | ***    |
|                        | GZMK         | 0.326  | ***    | 0.160  | **     |
| Effector memory T-cell | GZMA         | 0.244  | ***    | 0.093  | 0.0860 |
|                        | CD69         | 0.447  | ***    | 0.317  | ***    |
|                        | CXCR6        | 0.323  | ***    | 0.159  | **     |
| Resident memory T-cell | MYADM        | 0.495  | ***    | 0.469  | ***    |
|                        | IL7R         | 0.509  | ***    | 0.399  | ***    |
| memory T-cell          | LAG3         | 0.105  | *      | 0.007  | 0.8992 |
|                        | CXCL13       | 0.132  | *      | 0.031  | 0.5722 |
| Exhausted T-cell       | LAYN         | 0.408  | ***    | 0.330  | ***    |

\* $P < 0.05$ , \*\* $P < 0.01$ , \*\*\* $P < 0.001$ .
